# Supplementary material
Source: Research Square preprint supplement (doi:10.21203/rs.3.rs-9427214/v1)
Supplement: Supplementary file 2 [file 5292170ebf107459fbf5f789.docx]

# **Table 1 | Cryo-EM data collection, refinement and validation statistics**

| **Data collection and preprocessing** | |  | |
| --- | --- | --- | --- |
| Microscope | FEI Titan Krios | | |
| Voltage (kV) | 300 | | |
| Electron exposure (e⁻/Å²/s) | 17.34 | | |
| Defocus range (µm) | -1.2 to -2.4 | | |
| Magnification | 81,000 | | |
| Pixel size (Å) | 0.83 | | |
| Symmetry imposed | C1 | | |
| Initial particle images (no.) | 3’169’956 | | |
| Final particle images (no.) | 702’836 | | |
|  | EMD-57080 EMD-57198 | | |
| Map resolution (Å) | 3.7 | | 3.5 |
| FSC threshold | 0.143 | | 0.143 |
| **Model building and Refinement** |  | |  |
| Model composition | PDB ID 29CP | | PDB ID 29IN |
| Non-hydrogen atoms | 7208 | | 3979 |
| Protein residues | 1250 | | 532 |
| Chains | 6 | | 3 |
| B factors (Å²) | 73.92 | | 57.95 |
| R.m.s. deviations |  | |  |
| Bond lengths (Å) | 0.004 | | 0.003 |
| Bond angles (°) | 0.964 | | 0.692 |
| Validation |  | |  |
| MolProbity score | 1.56 | | 1.94 |
| Clashscore | 1.68 | | 9.32 |
| Rotamer outliers (%) | 1.25 | | 0.00 |
| Ramachandran plot (%) |  | |  |
| Favoured | 89.18 | | 93.16 |
| Allowed | 10.02 | | 6.84 |
| Outliers | 0.81 | | 0.00 |
